# Supplementary material for: Assessment of Crosslinkers between Peptide Antigen and Carrier Protein for Fusion Peptide-Directed Vaccines against HIV-1
Source: MDPI journal article supplement (doi:10.3390/vaccines10111916), 2022-11-12
Supplement: s1 [file s1]

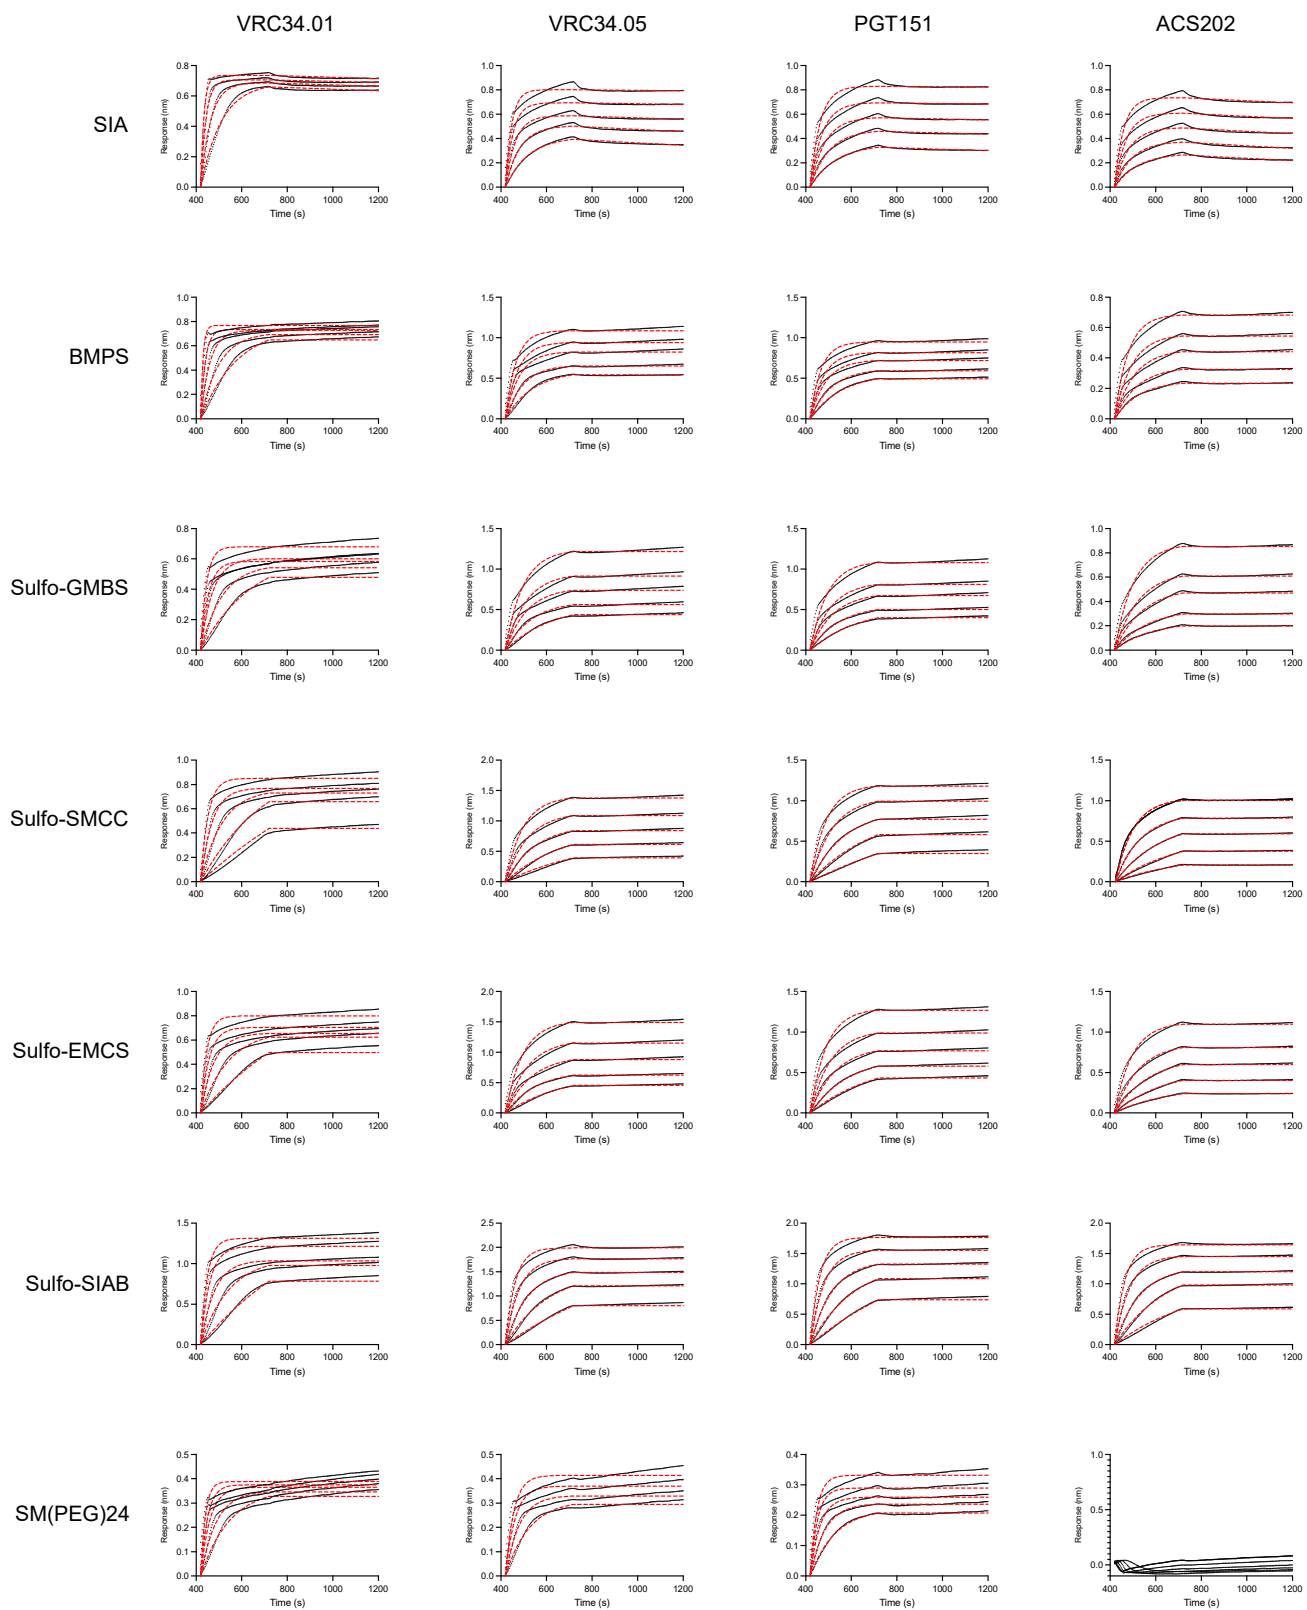

**Figure S1. BLI binding curves for antigenicity measurements of the conjugates.**

Binding curves are shown as black lines, while red lines indicate the global fits generated by using a 1:1 Langmuir binding model.

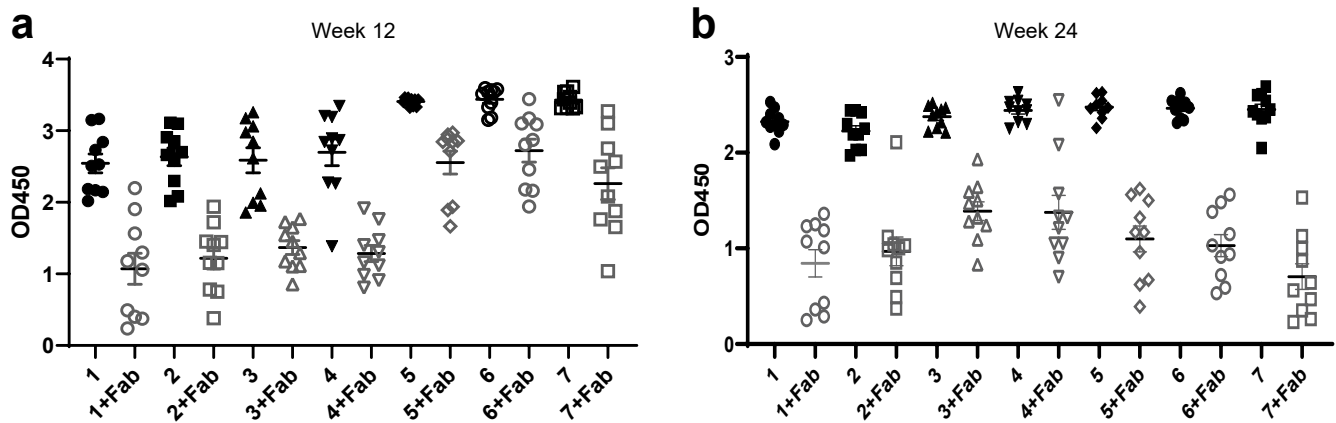

**Figure S2. Env trimer anti-base responses.**

Anti-base responses were measured using the antigen-binding fragment (Fab) of base-directed antibody R19R in a competition assay at wk12 (**a**) and at wk24 (**b**). Solid and empty symbols represent OD450 values of serum at 1:500 dilution without and with R19R competitor with BG505 DS-SOSIP trimer.

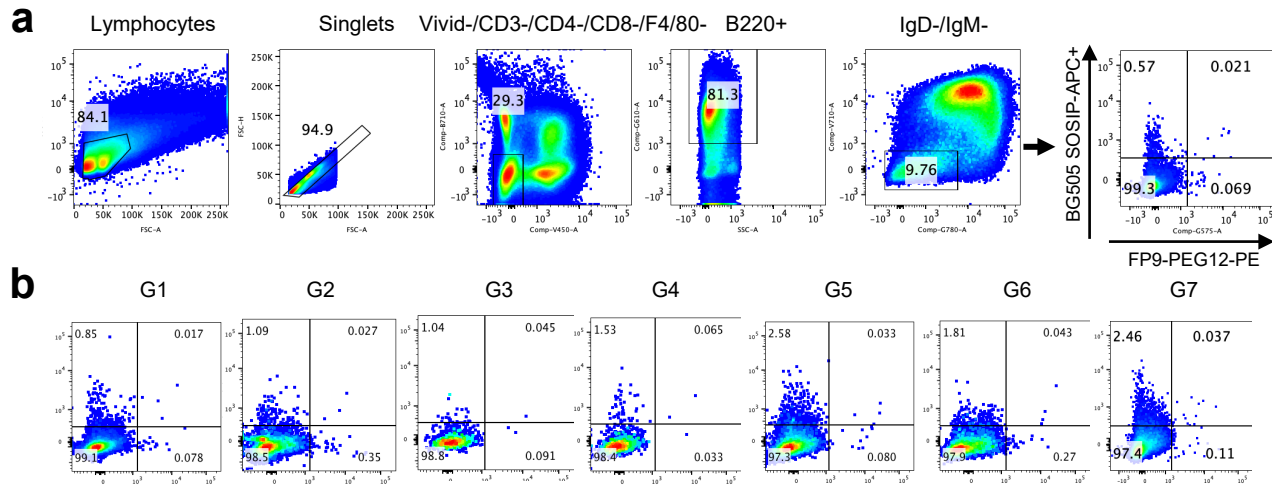

**Figure S3. Double positive B cell quantification.**

(a) Gating strategy for antigen-specific B cell FACS analysis. Splenocytes from a naïve mouse were used as a control to set up gating for the analysis of splenocytes from immunized mice. (b) Representatives with median values of FP+BG505+ B cell frequency for each group are shown for 7 groups.

## Serological properties

p value:  
≤ 0.0005  
0.005 - 0.0005  
0.05 - 0.005  
> 0.05  
R<sup>2</sup>:  
≥ 0.8

|                   | FP Octet responses<br>(Week 4) | FP Octet responses<br>(Week 6) | FP Octet responses<br>(Week 24) | Trimer ELISA (Week<br>6) | Trimer ELISA (Week<br>8) | Trimer ELISA (Week<br>10) | Trimer ELISA (Week<br>24) | Trimer base<br>response (Week 12) | Trimer base<br>response (Week 24) | Double positive B<br>cells (%) |
|-------------------|--------------------------------|--------------------------------|---------------------------------|--------------------------|--------------------------|---------------------------|---------------------------|-----------------------------------|-----------------------------------|--------------------------------|
| Spacer length (Å) | 0.07                           | 0.14#                          | -0.14                           | 0.14                     | -0.12                    | -0.07                     | 0.71                      | -0.86#                            | 0.36                              | -0.07                          |
| Molecular weight  | 0.29                           | 0.09#                          | -0.02                           | 0.24                     | -0.01                    | -0.10                     | 0.47                      | -0.81                             | 0.14                              | 0.21                           |
| Stoichiometry     | -0.01                          | -0.46#                         | 0.05                            | 0.00                     | 0.04                     | 0.16                      | 0.33                      | 0.13                              | -0.20                             | -0.18                          |
| Multimerization   | 0.70                           | 0.77                           | 0.25                            | 0.48                     | 0.31                     | 0.08                      | -0.69                     | -0.20                             | -0.33                             | 0.69                           |
| LogP              | 0.57                           | 0.94#                          | 0.29                            | 0.50                     | 0.35                     | 0.50                      | -0.50                     | -0.24                             | -0.14                             | 0.25                           |
| SH reactive group | 0.13                           | -0.65                          | 0.13                            | 0.00                     | 0.19                     | 0.25                      | 0.44                      | 0.00                              | -0.38                             | -0.47                          |
| Ag. score         | 0.59                           | 0.65                           | 0.48                            | 0.59                     | 0.49                     | 0.65                      | -0.11                     | -0.03                             | -0.48                             | 0.00                           |
| RU (VRC34.01)     | 0.51                           | 0.62                           | 0.15                            | 0.46                     | 0.12                     | 0.39                      | -0.10                     | -0.34#                            | -0.10                             | 0.41                           |
| kon (VRC34.01)    | 0.21                           | -0.03                          | 0.52                            | 0.36                     | 0.49                     | 0.57                      | 0.08                      | 0.36                              | -0.52                             | -0.43                          |
| RU (VRC34.05)     | 0.93#                          | 0.61                           | 0.60                            | 0.72                     | 0.70                     | 0.55                      | -0.25                     | -0.25                             | -0.74                             | 0.13                           |
| kon (VRC34.05)    | -0.37                          | 0.90                           | -0.26                           | -0.16                    | -0.30                    | 0.29                      | -0.22                     | 0.11                              | 0.60#                             | -0.20                          |
| RU (PGT151)       | 0.93#                          | 0.60                           | 0.61                            | 0.64#                    | 0.65                     | 0.46                      | -0.25                     | -0.38                             | -0.59                             | 0.43                           |
| kon (PGT151)      | -0.14                          | -0.81                          | 0.04                            | -0.30                    | 0.02                     | -0.20                     | 0.18                      | 0.34#                             | -0.35                             | -0.23                          |
| RU (AC8202)       | 0.60#                          | 0.90                           | 0.71                            | 0.80#                    | 0.70                     | 0.55                      | -0.36                     | -0.12                             | -0.60                             | 0.31                           |
| kon (AC8202)      | -0.25                          | 0.80                           | -0.50                           | -0.21                    | -0.34                    | 0.11                      | -0.04                     | -0.43                             | 0.79#                             | -0.29                          |

**Figure S4. Correlations between linker and serological properties.**

Spearman rho values are shown. Correlations with high Spearman significance ( $p \leq 0.05$ ) are highlighted in purple (scale shown). Correlations which maintained Spearman significance when outlier SM(PEG)24 was excluded are denoted with a #. Correlations which failed to meet requirements for Spearman significance and Pearson correlation assumptions but fit to a linear (or log-transformed linear) model ( $R^2 \geq 0.8$ ) are highlighted in red. For serological properties, the geometric mean was taken over each participant group, with 0 values converted to 1. For the SH reactive linker property, Iodoacetyl was coded as 0 and Maleimide was coded as 1.

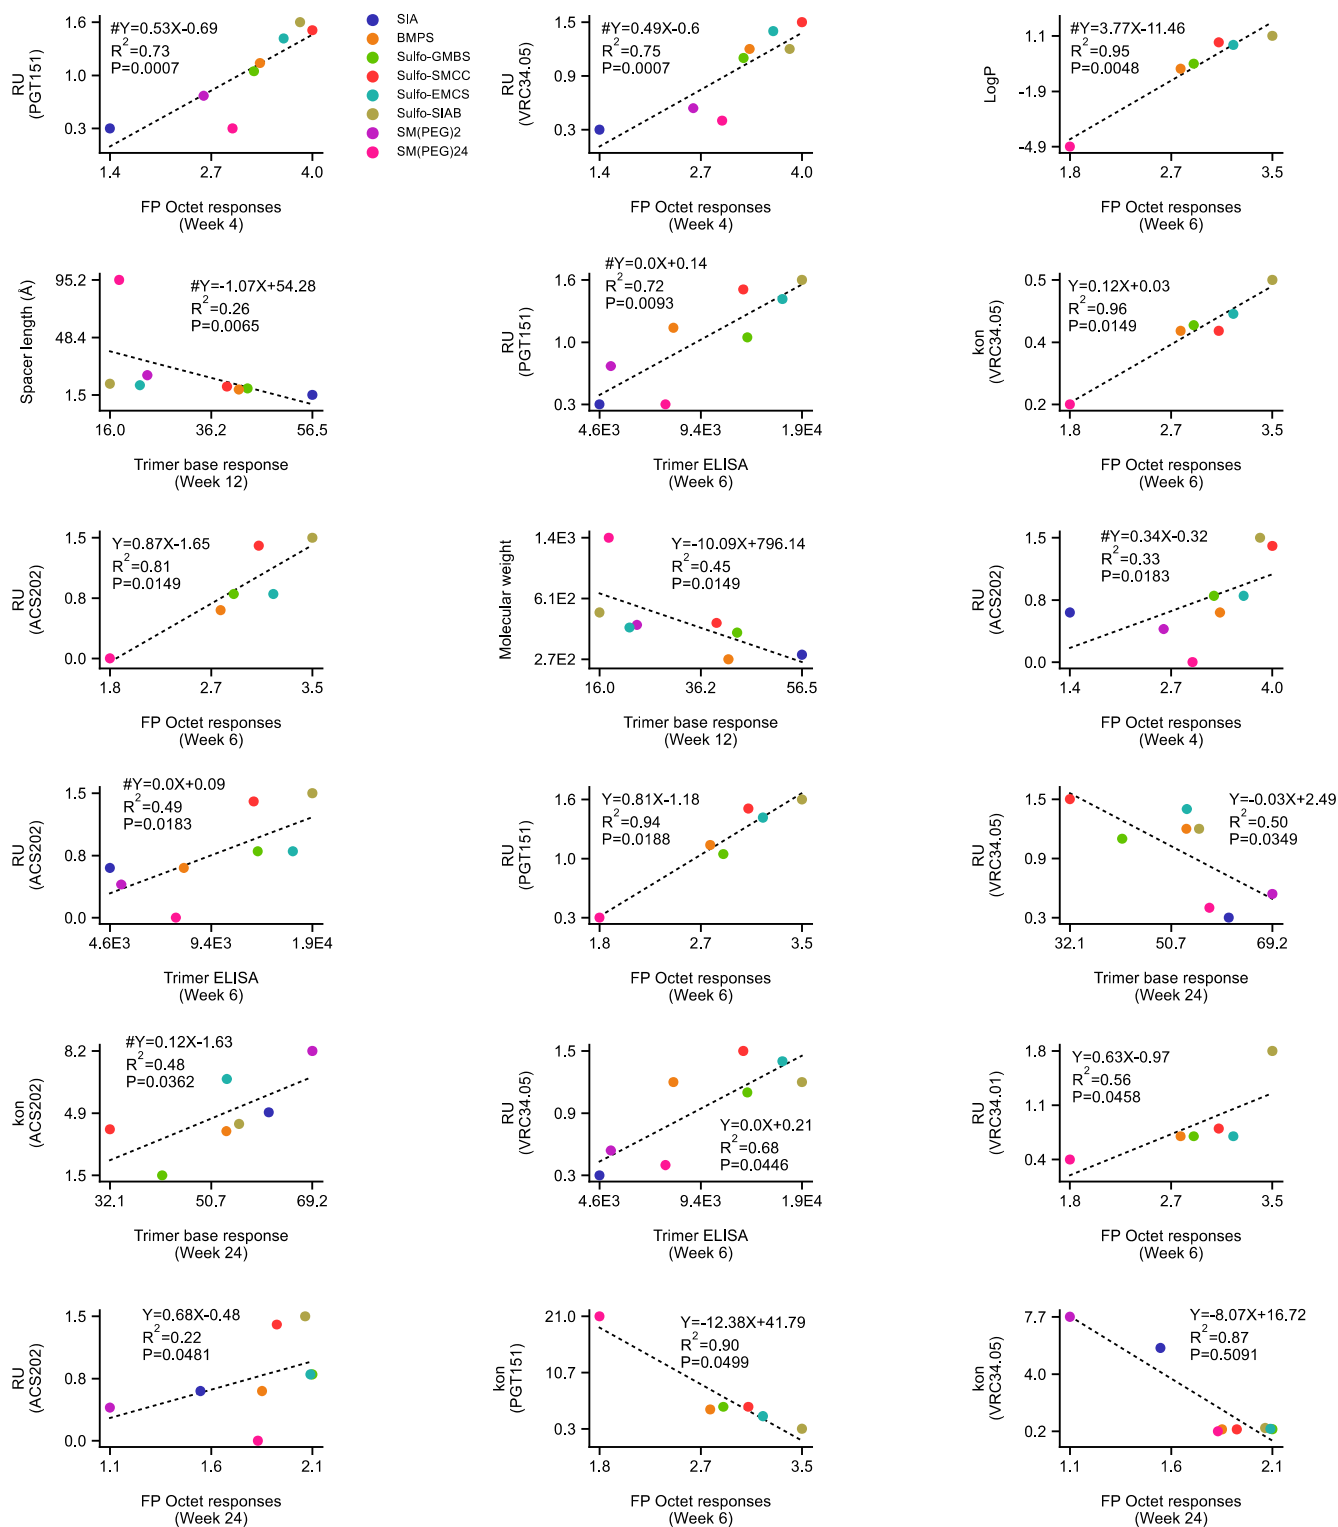

**Figure S5. Visualizing correlations between linker and serological properties.**

Correlation plots which 1) have high Spearman significance ( $p \leq 0.05$ ) or 2) fit to a linear (or log-transformed linear) model ( $R^2 \geq 0.8$ ) are shown, ordered left to right and top to bottom in terms of significance. Correlations which maintained Spearman significance when outlier SM(PEG)24 was excluded are denoted with a #. The linear (or log-transformed linear) regression model is also shown. Participant groups are colored according to linker, legend is shown.

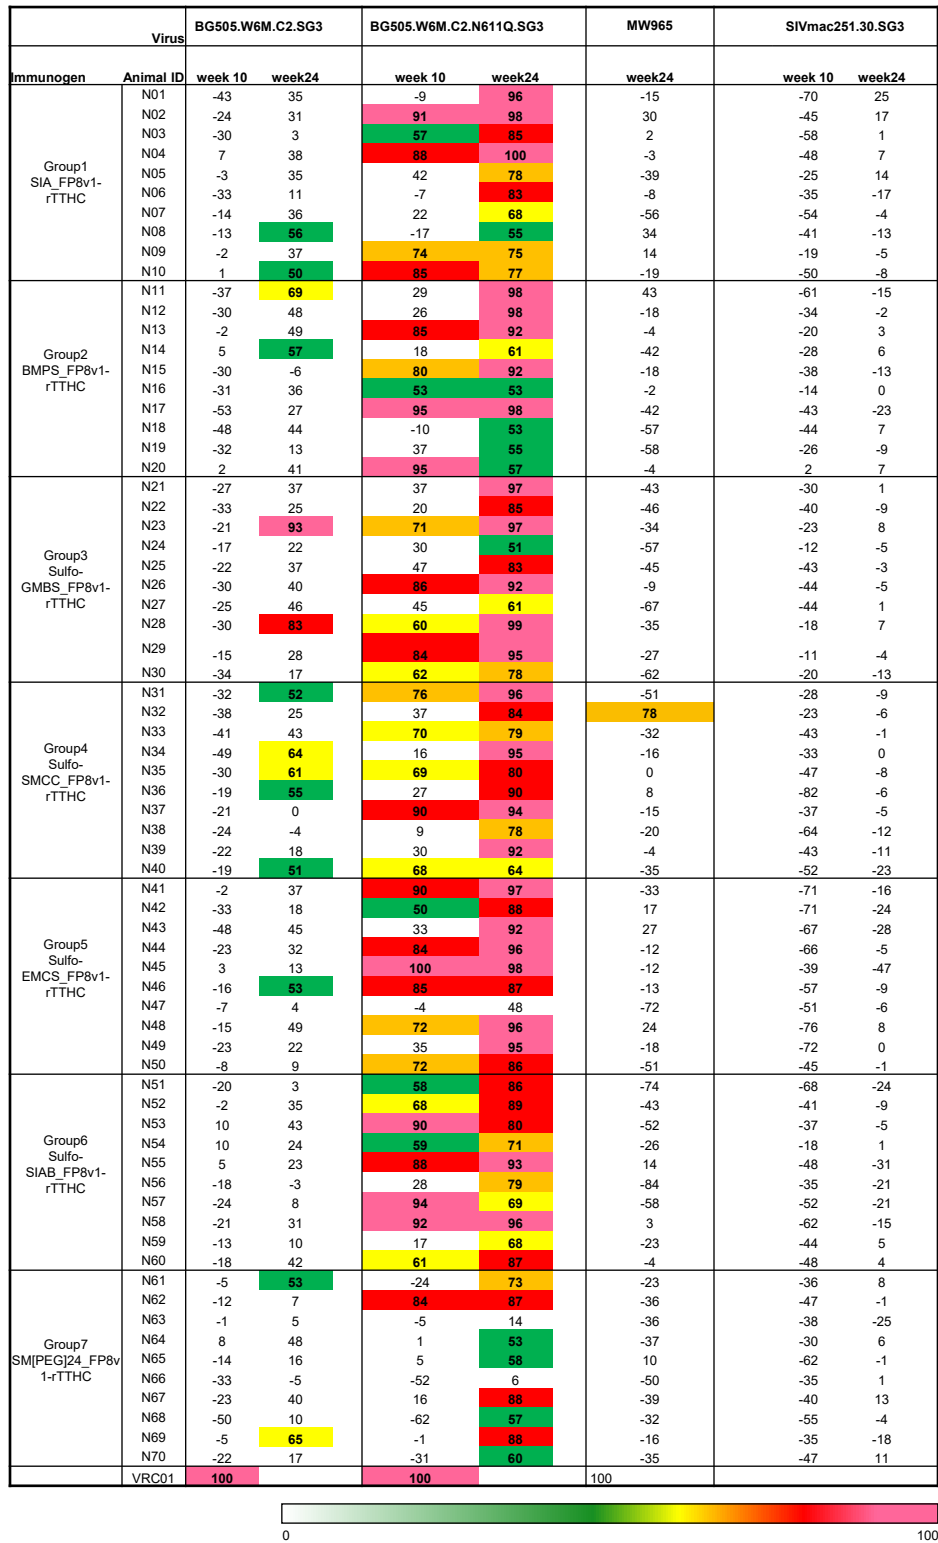

**Figure S6. Week 10 and 24 serum neutralization.**

Virus neutralization assays with the immune sera at week 10 and 24. Sera at 1:50 dilution were used to neutralize the BG505 and its Δ611 virus.

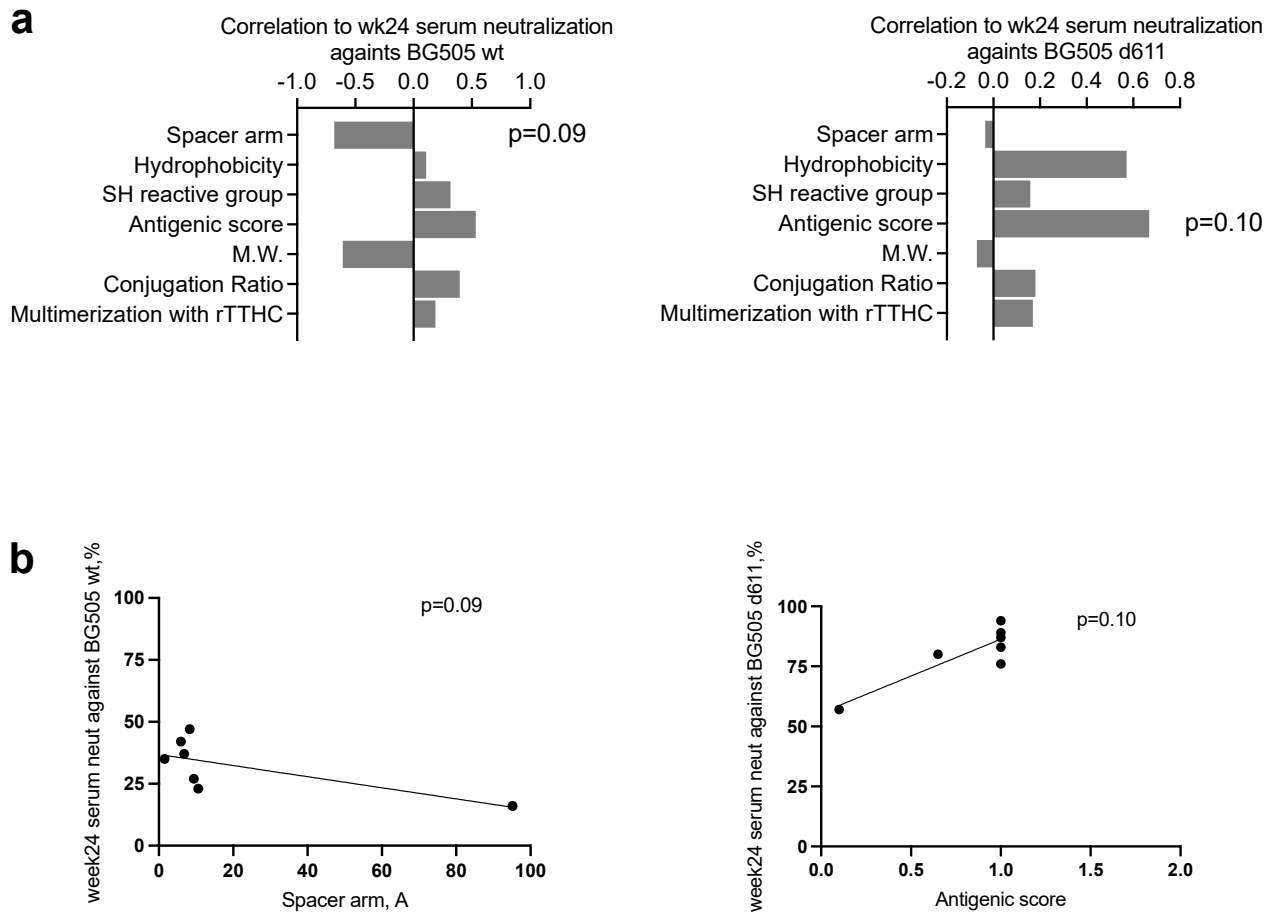

**Figure S7. Correlation analyses between serum neutralization data and physical parameters of immunization.**

(a) Virus neutralization assays with the immune sera at week 24. Sera at 1:50 dilution were used to neutralize the BG505  $\Delta$ 611 virus.  $P$  values were calculated with Spearman correlation. (b) Plots for the largest correlations in panel a are shown, these correlation are not statistically significant, and correlation relative to the spacer arm are defined by a single outlier.

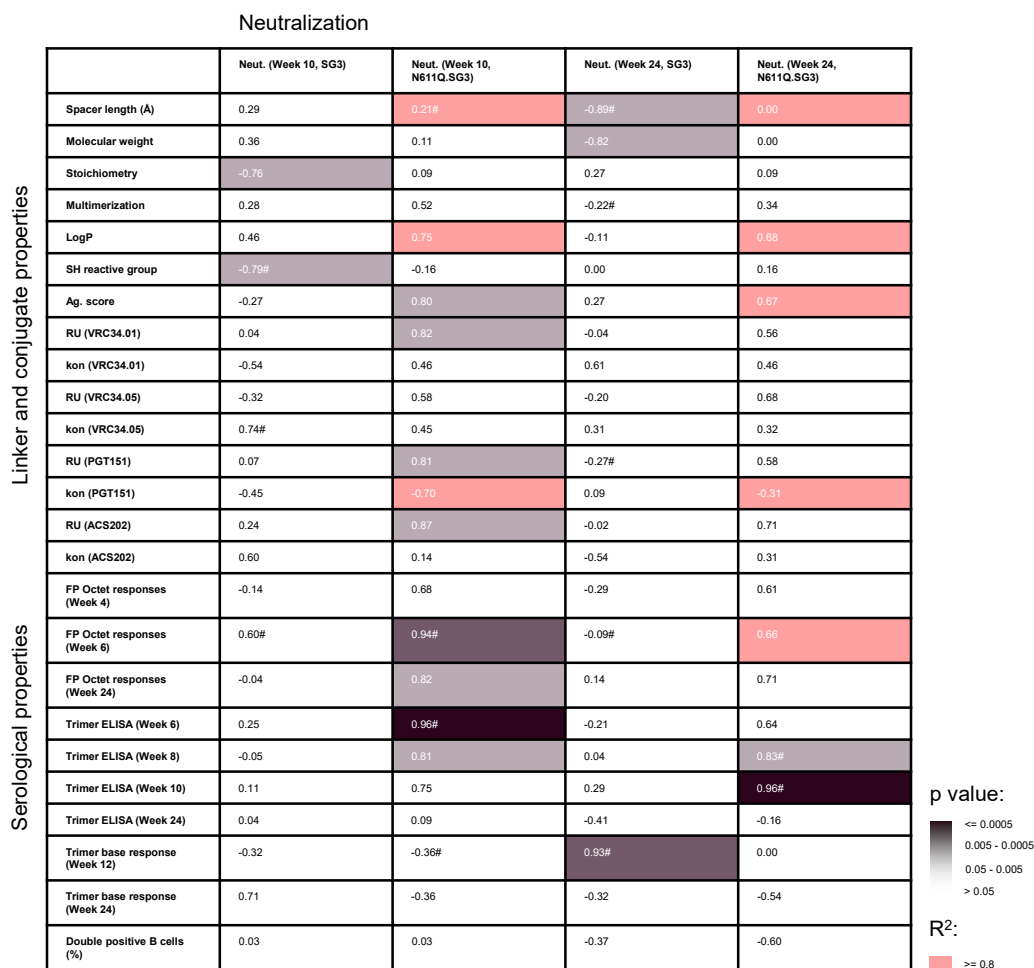

**Figure S8. Correlations between neutralization, linker, and serological properties.**

Spearman rho values are shown. Correlations with high Spearman significance ( $p \leq 0.05$ ) are highlighted in purple (scale shown). Correlations which maintained Spearman significance when outlier SM(PEG)24 was excluded are denoted with a #. Correlations which failed to meet requirements for Spearman significance and Pearson's test assumptions but fit to a linear (or log-transformed linear) model ( $R^2 \geq 0.8$ ) are highlighted in red. For serological properties, the geometric mean was taken over each group, with 0 values converted to 1. For neutralization, a constant was added to all values, so all were  $\geq 1$  prior to geometric mean quantification. For the SH reactive linker property, Iodoacetyl was coded as 0 and Maleimide was coded as 1.



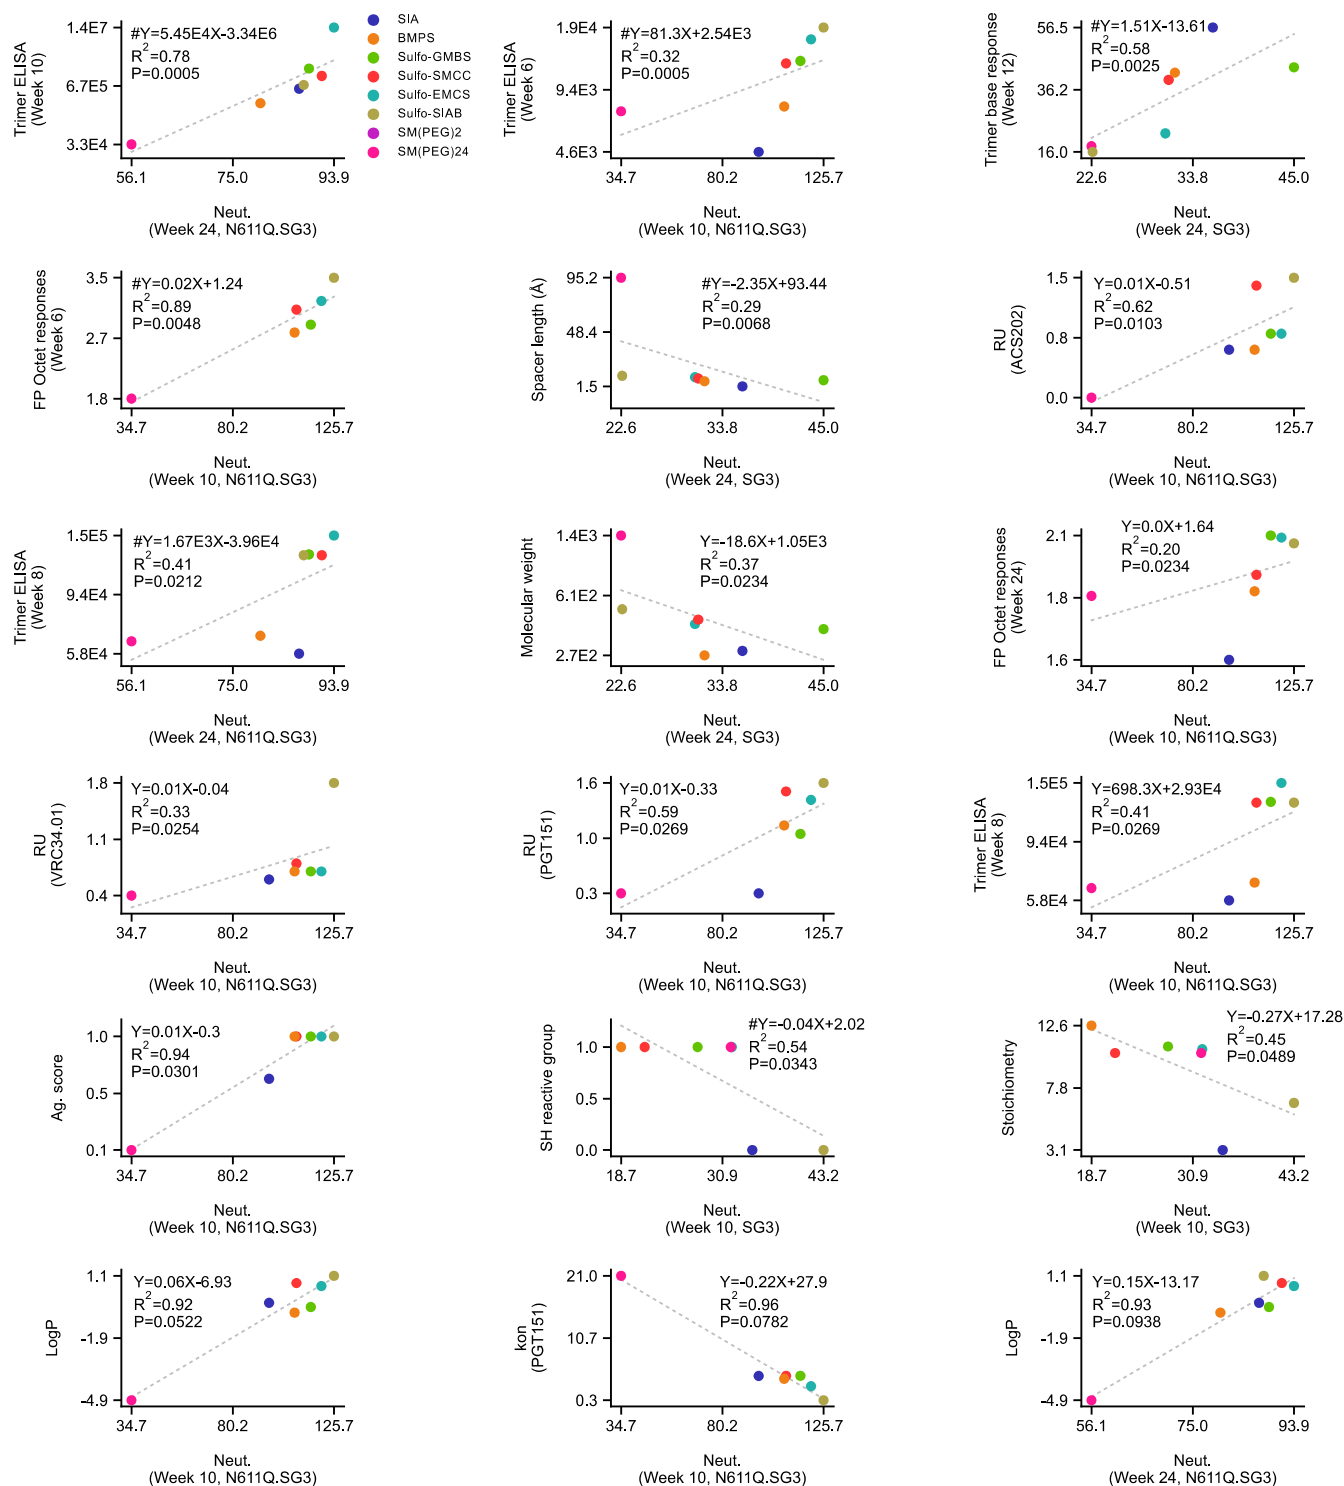

**Figure S9. Visualizing correlations between neutralization, linker, and serological properties.**

Correlation plots which 1) have high Spearman significance ( $p \leq 0.05$ ) or 2) fit to a linear (or log-transformed linear) model ( $R^2 \geq 0.8$ ) are shown, ordered left to right and top to bottom in terms of significance. Correlations which maintained Spearman significance when outlier SM(PEG)24 was excluded are denoted with a #. The linear (or log-transformed linear) regression model is also shown. Participant groups are colored according to linker, legend is shown.
